# Supplementary material for: The Nursing Stress Scale-Spanish Version: An Update to Its Psychometric Properties and Validation of a Short-form Version in Acute Care Hospital Settings
Source: Int J Environ Res Public Health. 2020 Nov 15;17(22):8456. doi: 10.3390/ijerph17228456 (PMC7697776; doi:10.3390/ijerph17228456)
Supplement: Supplementary file 1 [file ijerph-17-08456-s001.pdf]

# Supplementary Material

Table 1. Reporting Guideline Checklist. COSMIN checklist.

| Items                                                                                                  | Nursing Stress Scale – Spanish<br>Version |
|--------------------------------------------------------------------------------------------------------|-------------------------------------------|
| General recommendations for the design of a study on measurement properties                            | +++                                       |
| Content validity                                                                                       | NR                                        |
| Structural validity                                                                                    | ++                                        |
| Internal consistency                                                                                   | +++                                       |
| Cross-cultural validity/measurement invariance                                                         | NR                                        |
| Measurement error and reliability                                                                      | +++                                       |
| Criterion validity                                                                                     | +++                                       |
| Hypotheses testing for construct validity                                                              | +++                                       |
| A. Comparison with other outcome measurement instruments (convergent validity)                         | +++                                       |
| B. Comparison between subgroups (discriminative or known-groups validity)                              | +++                                       |
| Responsiveness                                                                                         | +++                                       |
| A. Criterion approach (i.e. comparison to a ‘gold standard’)                                           | +++                                       |
| B. Construct approach (i.e. hypotheses testing; comparison with other outcome measurement instruments) | +++                                       |
| C. Construct approach: (i.e. hypotheses testing; comparison between subgroups)                         | NR                                        |
| D. Construct approach: (i.e. hypotheses testing; before and after intervention)                        | NR                                        |
| Translation process                                                                                    | NR                                        |
